# Supplementary material for: Design and Methods for a Comparative Effectiveness Pilot Study: Virtual World vs. Face-to-Face Diabetes Self-Management
Source: PubMed Central journal article supplement (PMC3626161; doi:10.2196/resprot.2415), 2012-12-17
Supplement: resprot_v1i2e24_app1.pdf [file resprot_v1i2e24_app1.pdf]

**Multimedia Appendix 1.** Comparison of Virtual World (VW) versus Face-to-Face Implementation of the Women in Control Curriculum.

| <i>Virtual World Condition</i>                                                                                                                                                                                                                                                                                                                                                                                                                                                                                                                                                                                                                                                                                                                                                                                                                                                                                                                                                                                            | <i>Face-to-Face (Control) Condition</i>                                                                                                                                                                                                                                                                                                                                                                                                                                                                                                                               |
|---------------------------------------------------------------------------------------------------------------------------------------------------------------------------------------------------------------------------------------------------------------------------------------------------------------------------------------------------------------------------------------------------------------------------------------------------------------------------------------------------------------------------------------------------------------------------------------------------------------------------------------------------------------------------------------------------------------------------------------------------------------------------------------------------------------------------------------------------------------------------------------------------------------------------------------------------------------------------------------------------------------------------|-----------------------------------------------------------------------------------------------------------------------------------------------------------------------------------------------------------------------------------------------------------------------------------------------------------------------------------------------------------------------------------------------------------------------------------------------------------------------------------------------------------------------------------------------------------------------|
| <b>Intervention Preparation</b>                                                                                                                                                                                                                                                                                                                                                                                                                                                                                                                                                                                                                                                                                                                                                                                                                                                                                                                                                                                           |                                                                                                                                                                                                                                                                                                                                                                                                                                                                                                                                                                       |
| <i>Set-up</i>                                                                                                                                                                                                                                                                                                                                                                                                                                                                                                                                                                                                                                                                                                                                                                                                                                                                                                                                                                                                             |                                                                                                                                                                                                                                                                                                                                                                                                                                                                                                                                                                       |
| <p>Both conditions will include the following intervention materials:</p> <ul style="list-style-type: none"> <li>▪ Scripted intervention manual</li> <li>▪ Slide set for each session</li> <li>▪ Participants' binder</li> <li>▪ Pedometer</li> <li>▪ Calorie King book and exercise DVD</li> </ul>                                                                                                                                                                                                                                                                                                                                                                                                                                                                                                                                                                                                                                                                                                                       |                                                                                                                                                                                                                                                                                                                                                                                                                                                                                                                                                                       |
| <ul style="list-style-type: none"> <li>▪ Sessions will be delivered in large, open-air virtual world (VW) Forum (see Figure 1) on Boston University Second Life (SL) island</li> <li>▪ Simple landscape for ease of navigation and visual appeal</li> <li>▪ Session space will be outfitted with cushions for sitting and various floor patterns (a confidence ruler, a color chart, and an agreement pie) to support group process. Exercise areas with yoga mats, tai chi balls, and an automated dance floor will be used</li> <li>▪ Curriculum slides imported and displayed on large screens that ring Forum outer circle</li> <li>▪ Individual sessions (session 1) will take place in private chat areas</li> <li>▪ Avatars will be created for each participant prior to first session. Physical characteristics will be similar to the patient population (African American hair and skin and 70% body fat) and named according to a convention of first name, first initial of last name (eg, MaryS)</li> </ul> | <ul style="list-style-type: none"> <li>▪ Sessions will be delivered in a large conference room at Boston Medical Center</li> <li>▪ The room will accommodate up to 15 participants, the interventionists, the display of educational self-management materials, and equipment (ie, a slide projector, easel)</li> <li>▪ Participants will be seated around a large table that will facilitate their use of intervention binders and note-taking, if desired</li> <li>▪ Session 1 (individual) will take place in a private office at Boston Medical Center</li> </ul> |
| <i>Interventionists and Staff Training and Support</i>                                                                                                                                                                                                                                                                                                                                                                                                                                                                                                                                                                                                                                                                                                                                                                                                                                                                                                                                                                    |                                                                                                                                                                                                                                                                                                                                                                                                                                                                                                                                                                       |
| <p>A single set of interventionists (a dietitian and a diabetes educator) will:</p> <ul style="list-style-type: none"> <li>▪ Receive the same training consisting of motivational interviewing, delivery of the intervention</li> </ul>                                                                                                                                                                                                                                                                                                                                                                                                                                                                                                                                                                                                                                                                                                                                                                                   |                                                                                                                                                                                                                                                                                                                                                                                                                                                                                                                                                                       |

|                                                                                                                                                                                                                                                                                                                                                                                                                                                                                                                                                                                                                                                                              |                                                                                                                                                                                                                                                                                                                                                                                                                                                                                 |
|------------------------------------------------------------------------------------------------------------------------------------------------------------------------------------------------------------------------------------------------------------------------------------------------------------------------------------------------------------------------------------------------------------------------------------------------------------------------------------------------------------------------------------------------------------------------------------------------------------------------------------------------------------------------------|---------------------------------------------------------------------------------------------------------------------------------------------------------------------------------------------------------------------------------------------------------------------------------------------------------------------------------------------------------------------------------------------------------------------------------------------------------------------------------|
| <p>protocol (ie, mock sessions for each condition)</p> <ul style="list-style-type: none"> <li>Deliver both interventions (take turns in leading the sessions)</li> <li>Receive ongoing (weekly) oversight and support</li> </ul>                                                                                                                                                                                                                                                                                                                                                                                                                                             |                                                                                                                                                                                                                                                                                                                                                                                                                                                                                 |
| <ul style="list-style-type: none"> <li>In addition to the above training, interventionists receive approximately 20 hours of SL training</li> <li>Additional technical support staff include:<br/><i>Instructional Technology and Operations staff:</i> will purchase, inventory, maintain, and support all computers and related equipment<br/><i>Two Producers:</i> skilled in basic SL, will provide SL technical support and troubleshooting<br/><i>Lead Producer:</i> overall SL project manager, manage the SL location and coordinate the producers</li> </ul>                                                                                                        | <ul style="list-style-type: none"> <li>No additional staff or training</li> </ul>                                                                                                                                                                                                                                                                                                                                                                                               |
| <p><b><i>Pre-Intervention Computer Training</i></b></p>                                                                                                                                                                                                                                                                                                                                                                                                                                                                                                                                                                                                                      |                                                                                                                                                                                                                                                                                                                                                                                                                                                                                 |
| <ul style="list-style-type: none"> <li>All participants will participate in two 2-hour computer training sessions (total of 4 hours).</li> <li>At the end of the second session, all participants will receive a laptop computer to take home and the intervention binders and other materials.</li> </ul>                                                                                                                                                                                                                                                                                                                                                                   |                                                                                                                                                                                                                                                                                                                                                                                                                                                                                 |
| <p>Session #1:</p> <ul style="list-style-type: none"> <li>VW participants will be instructed on their laptop kits (MacBook, power cord, headset, 4G wireless modem), the computer (keyboard, trackpad, basic commands), connecting to the Internet, and will receive a passive introduction to the SL environment (using a presentation screen)</li> </ul> <p>Session #2:</p> <ul style="list-style-type: none"> <li>VW participants will meet their avatar and will be taught how to use SL, log in, teleport, move, send messages via local chat and IM</li> <li>VW participants will have a SL skills check</li> </ul> <p>Additional training or home visit as needed</p> | <p>Session #1:</p> <ul style="list-style-type: none"> <li>Face-to-face participants will be instructed on their laptop kits (Dell laptop, power cord, 4G wireless modem), the computer (keyboard, trackpad, basic commands), and connecting to the Internet</li> </ul> <p>Session #2:</p> <ul style="list-style-type: none"> <li>Face-to-face participants will be taught how to use email and Skype, set up accounts, and how to use a web browser to search online</li> </ul> |
| <p><b><i>Typical Session</i></b></p>                                                                                                                                                                                                                                                                                                                                                                                                                                                                                                                                                                                                                                         |                                                                                                                                                                                                                                                                                                                                                                                                                                                                                 |
| <ul style="list-style-type: none"> <li>Session 1 will be administered individually lasting approximately 30 minutes.</li> <li>Sessions 2-9 will be conducted in a group format lasting 90 minutes.</li> </ul>                                                                                                                                                                                                                                                                                                                                                                                                                                                                |                                                                                                                                                                                                                                                                                                                                                                                                                                                                                 |
| <ul style="list-style-type: none"> <li>All encounters occur in SL</li> </ul>                                                                                                                                                                                                                                                                                                                                                                                                                                                                                                                                                                                                 | <ul style="list-style-type: none"> <li>All encounters occur in person</li> </ul>                                                                                                                                                                                                                                                                                                                                                                                                |

- |                                                                                                                                                                                                                                                                                                                                                                                                                                                                                                                                                                                                                                                                                                                                                                                                                                                                                                                                                                                                                                                                                                                                                                                                                                                                                                                                                    |                                                                                                                                                                                                                                                                                                                                                                                                                                                                                                                                                                                                                                                                                                                                   |
|----------------------------------------------------------------------------------------------------------------------------------------------------------------------------------------------------------------------------------------------------------------------------------------------------------------------------------------------------------------------------------------------------------------------------------------------------------------------------------------------------------------------------------------------------------------------------------------------------------------------------------------------------------------------------------------------------------------------------------------------------------------------------------------------------------------------------------------------------------------------------------------------------------------------------------------------------------------------------------------------------------------------------------------------------------------------------------------------------------------------------------------------------------------------------------------------------------------------------------------------------------------------------------------------------------------------------------------------------|-----------------------------------------------------------------------------------------------------------------------------------------------------------------------------------------------------------------------------------------------------------------------------------------------------------------------------------------------------------------------------------------------------------------------------------------------------------------------------------------------------------------------------------------------------------------------------------------------------------------------------------------------------------------------------------------------------------------------------------|
| <ul style="list-style-type: none"> <li>▪ In a typical session, the VW group consists of the participants' avatars and two interventionists, and two producers provide technical support</li> <li>▪ VW participants will be asked to arrive 30 minutes early to test their sound and troubleshoot any connection problems</li> <li>▪ The interventionist not leading the session will take notes in local chat and provide general back</li> <li>▪ Interventionists will lead discussions by walking participants around the perimeter of the Forum to see slides</li> <li>▪ In addition to group discussions and review of materials in the participants' binder, participants will be involved in activities set up for their avatars. For example, <ul style="list-style-type: none"> <li>➤ When asked to indicate goal self-efficacy, avatars will stand on a number from 1 to 10 displayed on the floor (see Figure 2)</li> <li>➤ Avatars will take field trips to a restaurant and a health club (Club One Island) to learn about exercise equipment and practice healthy food ordering and eating practices (see Figure 3)</li> <li>➤ At the conclusion of each session, avatars will be invited to participate in some form of physical activity: dancing, tai chi, yoga, or a walk around the island (see Figure 4)</li> </ul> </li> </ul> | <ul style="list-style-type: none"> <li>▪ In a typical session, the face-to-face group consists of the participants and the two interventionists only</li> <li>▪ No additional time requirements</li> <li>▪ The interventionist not leading the session will assist with logistical issues (ie, late arrivals, setting up materials)</li> <li>▪ Interventionists will lead discussions by using slides and an easel</li> <li>▪ The curriculum will be implemented primarily through group discussions and review of selected materials in the participant's binder</li> <li>▪ Interventionists will implement a 5-minute physical activity break at each session (ie, stretching demonstration; walking with pedometer)</li> </ul> |
|----------------------------------------------------------------------------------------------------------------------------------------------------------------------------------------------------------------------------------------------------------------------------------------------------------------------------------------------------------------------------------------------------------------------------------------------------------------------------------------------------------------------------------------------------------------------------------------------------------------------------------------------------------------------------------------------------------------------------------------------------------------------------------------------------------------------------------------------------------------------------------------------------------------------------------------------------------------------------------------------------------------------------------------------------------------------------------------------------------------------------------------------------------------------------------------------------------------------------------------------------------------------------------------------------------------------------------------------------|-----------------------------------------------------------------------------------------------------------------------------------------------------------------------------------------------------------------------------------------------------------------------------------------------------------------------------------------------------------------------------------------------------------------------------------------------------------------------------------------------------------------------------------------------------------------------------------------------------------------------------------------------------------------------------------------------------------------------------------|
